# Supplementary material for: Structural and photoluminescent investigation of LTbH/LEuH nanosheets and their color-tunable colloidal hybrids
Source: Royal Society of Chemistry journal article supplement (doi:10.1039/c3tc30205a), 2013-01-01
Supplement: c3tc30205a.pdf [file c3tc30205a.pdf]

## Electronic Supplementary Information

### Structural, Photoluminescent Investigation of LTbH/LEuH Nanosheets and Their Color-Tunable Colloidal Hybrids

Yushuang Zhao, Ji-Guang Li, Mengxi Guo, and Xiaojing Yang

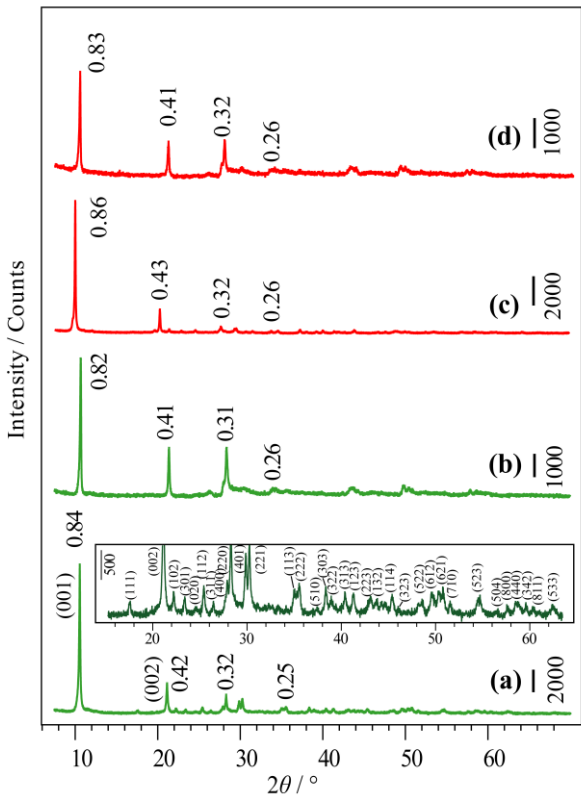

**Fig. S1** XRD patterns of (a)  $\text{Cl}^-$ -LTbH, (b)  $\text{NO}_3^-$ -LTbH, (c)  $\text{Cl}^-$ -LEuH, and (d)  $\text{NO}_3^-$ -LEuH.

All the diffraction peaks of  $\text{Cl}^-$ -LTbH are indexable to the space group of  $P2_12_12$  (orthorhombic symmetry), according to the reference.<sup>10a</sup>

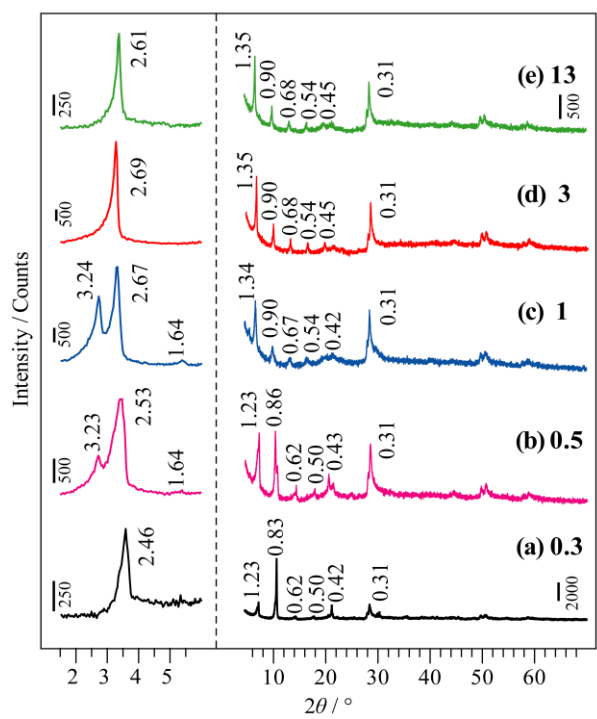

**Fig. S2** XRD patterns of DS<sup>-</sup> intercalated LTbH samples with different DS<sup>-</sup>/Tb<sup>3+</sup> molar ratios (a) 0.3, (b) 0.5, (c) 1, (d) 3, and (e) 13.

The diffraction peaks of the DS<sup>-</sup>-LRHs were obtained *via* the same synthesis method with different DS<sup>-</sup>/Tb<sup>3+</sup> molar ratios and different  $d_{\text{basal}}$  values were observed.

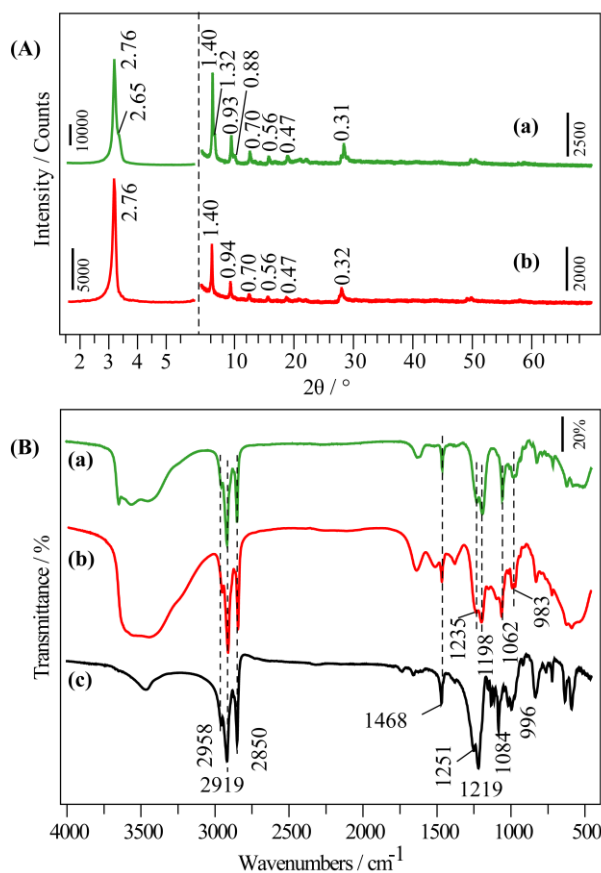

**Fig. S3** XRD patterns and FT-IR spectra of the samples obtained by ion-exchange reaction from  $\text{Cl}^-$ -type (a) LTbH and (b) LEuH\*, comparing with (c) SDS.

The  $\text{Cl}^-$ -type LTbH and LEuH samples were synthesized through the same method as described in the Experimental Section, except for the molar ratios of raw materials, i.e.,  $\text{LnCl}_3 \cdot 6\text{H}_2\text{O}/\text{NaCl}/\text{HMT} = 1/13/1$  were used. The ion-exchange reaction was carried out by following:

(1) The sample (100 mg) was immersed in 80 mL SDS aqueous solution. The mole of SDS was 3 times of  $\text{Tb}^{3+}$ .

(2) the mixture was autoclaved at 70  $^\circ\text{C}$  for 48 h, and then filtered, washed with distilled water and anhydrous ethanol several times. The sample was finally air-dried at room temperature.

As shown in Fig. S3A, the basal spacings were changed to 2.76 nm, indicating the intercalation of  $\text{DS}^-$ . Fig. S3B showed the existence of  $\text{DS}^-$  in the samples.

## Note:

\* The XRD pattern of LEuH was obtained from Nankai Chu, Master Dissertation of Beijing Normal University, The syntheses, structures and properties of organic-layered europium hydroxide composites, 2012.

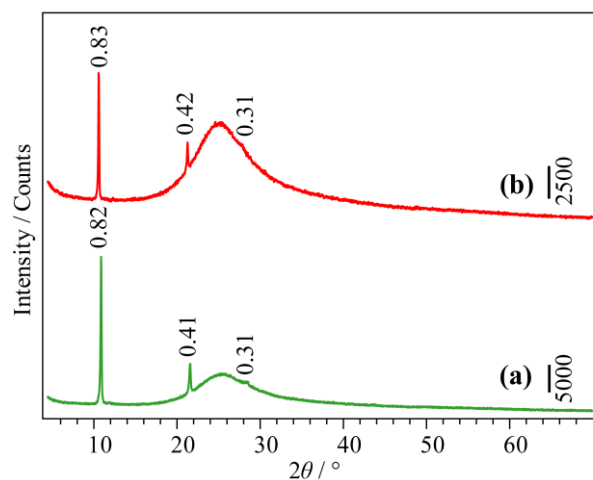

**Fig. S4** XRD patterns of the aggregates centrifuged from (a)  $\text{NO}_3^-$ -LTbH and (b)  $\text{NO}_3^-$ -LEuH suspensions.

5 The sharp peaks show the well stacked layers. That is, the delamination is infeasible for the  $\text{NO}_3^-$ -type LTbH and LEuH. The similar result was also obtained for the LRHs of  $\text{Cl}^-$ -type.
